# Supplementary material for: Designing of Chitosan Derivatives Nanoparticles with Antiangiogenic Effect for Cancer Therapy
Source: MDPI journal article supplement (doi:10.3390/nano10040698), 2020-04-07
Supplement: s1 [file s1]

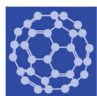

# Antiangiogenic effect with antitumoral potential of antioxidant chitosan nanoparticles, on Chick Chorioallantoic Membrane

Oana-Maria Dragostin<sup>1\*</sup>, Rodica Tatia<sup>2#</sup>, Sangram Keshari Samal<sup>3#</sup>, Anca Oancea<sup>2</sup>, Alexandra Simona Zamfir<sup>4</sup>, Ionuț Dragostin<sup>4</sup>, Elena-Lăcrămioara Lisă<sup>1</sup>, Constantin Apetrei<sup>5\*</sup>, Carmen Lăcrămioara Zamfir<sup>4</sup>

<sup>1</sup> Research Centre in the Medical-Pharmaceutical Field, Faculty of Medicine and Pharmacy, "Dunarea de Jos" University of Galati, 800008, Galati, Romania; oana.dragostin@ugal.ro ; elenalisa@yahoo.com

<sup>2</sup> Romanian National Institute of Research and Development for Biological Sciences, 296 Splaiul Independentei, 060031 Bucharest, Romania; rodica.tatia@gmail.com

<sup>3</sup> Laboratory of Biomaterials and Regenerative Medicine for Advanced Therapies, Indian Council of Medical Research-Regional Medical Research Centre, Bhubaneswar 751 023, Odisha, India; sksamalrec@gmail.com

<sup>4</sup> Department of Morpho-Functional Sciences I, Faculty of Medicine, University of Medicine and Pharmacy "Gr.T.Popa" Iasi, Romania; simona.zamfir14@gmail.com; ionut.dragostin@yahoo.com; zamfircia@yahoo.com

<sup>5</sup> Department of Chemistry, Physics and Environment, The European Centre of Excellence for the Environment, Faculty of Sciences and Environment, "Dunarea de Jos" University of Galati, 800008 Galati, Romania; apetreic@ugal.ro

\* Correspondence: oana.dragostin@yahoo.com (O.M.D) ; apetreic@ugal.ro (C.A)

# These authors had equal contributions

Received: 15 March 2020; Accepted: 3 April 2020; Published: 7 April 2020

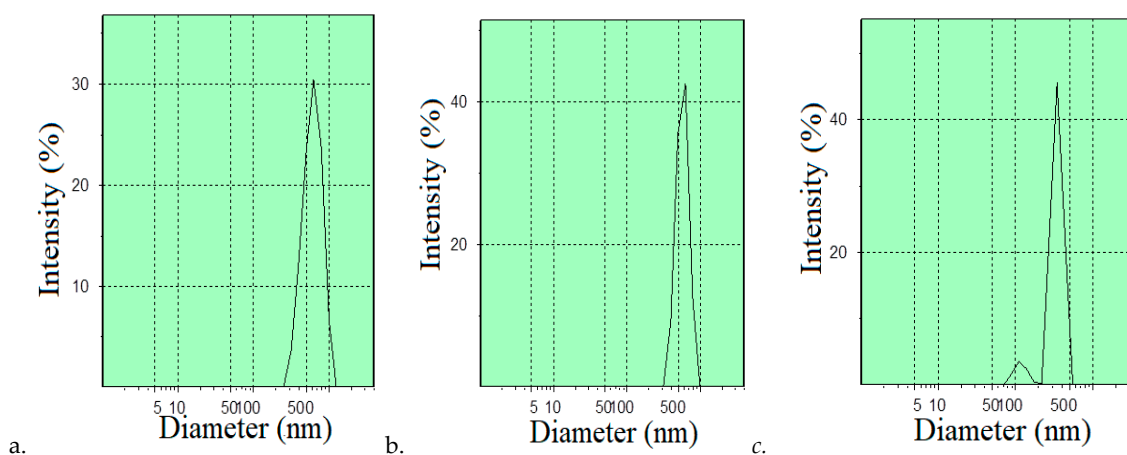

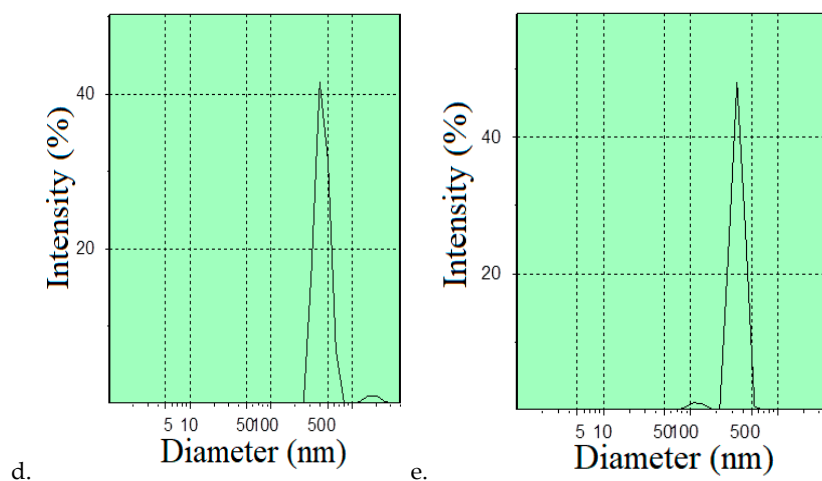

**Fig. S1.** DLS measurements: The size distribution by intensity of chitosan and chitosan derivatives nanoparticles (a. CLA; b. CLB; c. CLC; d. CLD; e. CL)

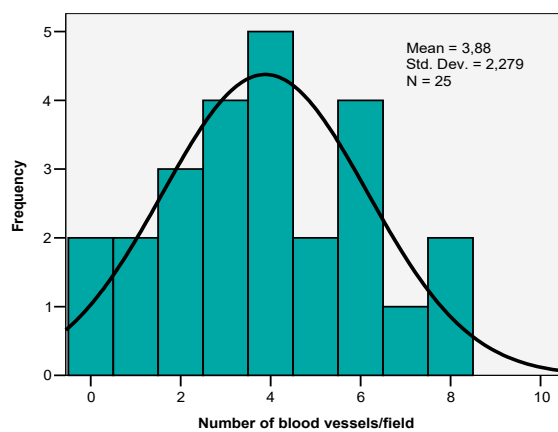

**Fig. S2.** Histogram of the number of blood vessels / field

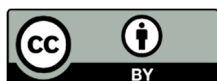

© 2020 by the authors. Submitted for possible open access publication under the terms and conditions of the Creative Commons Attribution (CC BY) license (<http://creativecommons.org/licenses/by/4.0/>).
